# Supplementary material for: KOH activation of coal-derived microporous carbons for oxygen reduction and supercapacitors
Source: Royal Society of Chemistry journal article supplement (doi:10.1039/d0ra01705a), 2020-01-01
Supplement: d0ra01705a1.pdf [file d0ra01705a1.pdf]

**Supporting Information**

**KOH activation of coal-derived microporous carbons for oxygen  
reduction and supercapacitors**

Shaokuo Guo,<sup>a,b</sup> Beibei Guo,<sup>b</sup> Ruguang Ma,<sup>b</sup> Yufang Zhu,<sup>b,\*</sup> and Jiacheng Wang<sup>b,\*</sup>

<sup>a</sup> School of Materials Science and Engineering, University of Shanghai for Science and Technology, Shanghai 200093, PR China

<sup>b</sup> State Key Laboratory of High Performance Ceramics and Superfine Microstructure, Shanghai Institute of Ceramics, Chinese Academy of Sciences, Shanghai 200050, PR China

\*zjf2412@163.com (Y. Zhu); jiacheng.wang@mail.sic.ac.cn (J. Wang)

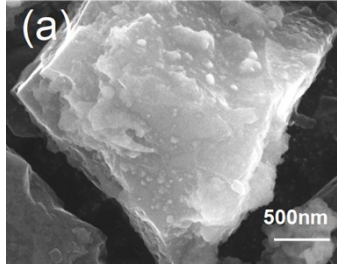

**Fig. S1** SEM of pure coal without KOH activation.

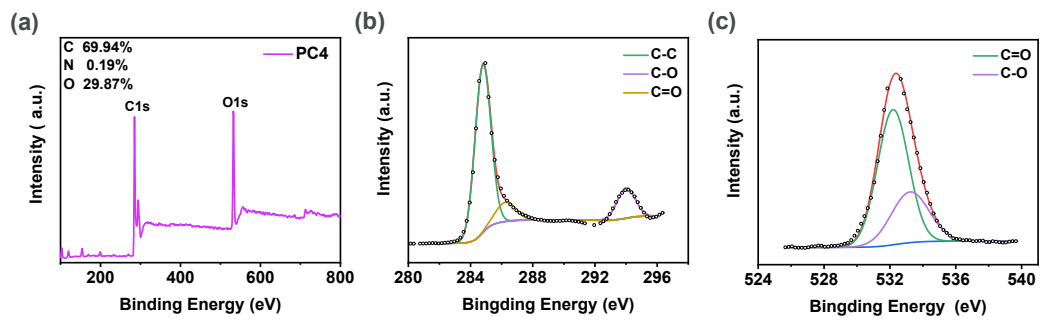

**Fig. S2** (a) XPS survey spectra of PC4; C1s (b) and O1s (c) XPS spectra of PC4.

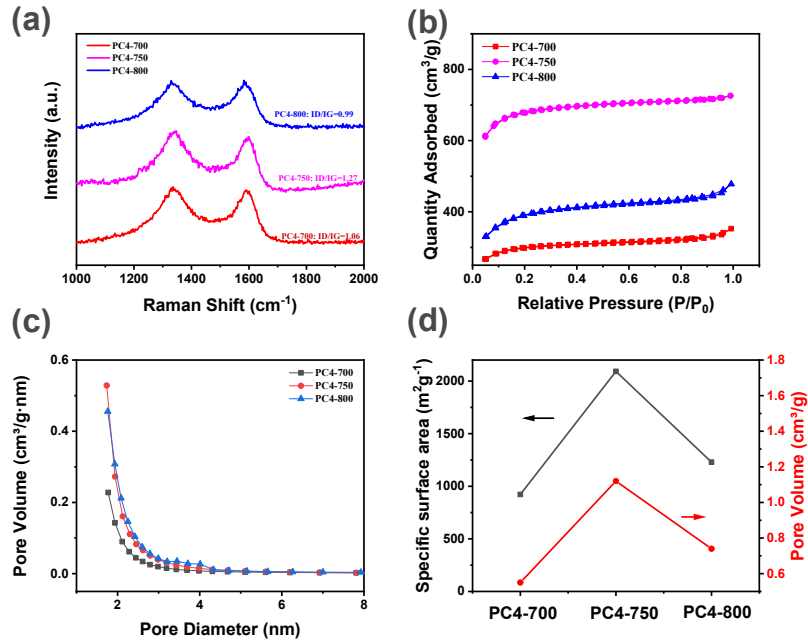

**Fig. S3** PCs of different temperature (a) Raman spectra; (b) nitrogen adsorption-desorption isotherms; (c) pore size distribution curves; (d) trend of specific surface area and pore volume.

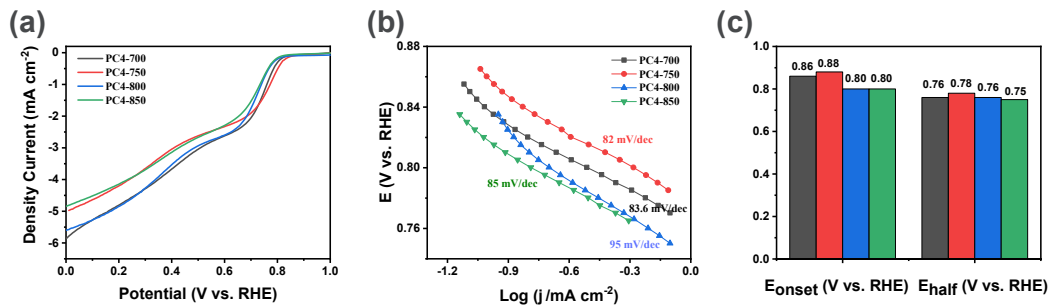

**Fig. S4** PCs of different temperature (a) LSV curves at 1600 rpm; (b) the corresponding Tafel plots; (c) Bar graph of E<sub>Onset</sub> and E<sub>Half-Wave</sub>.

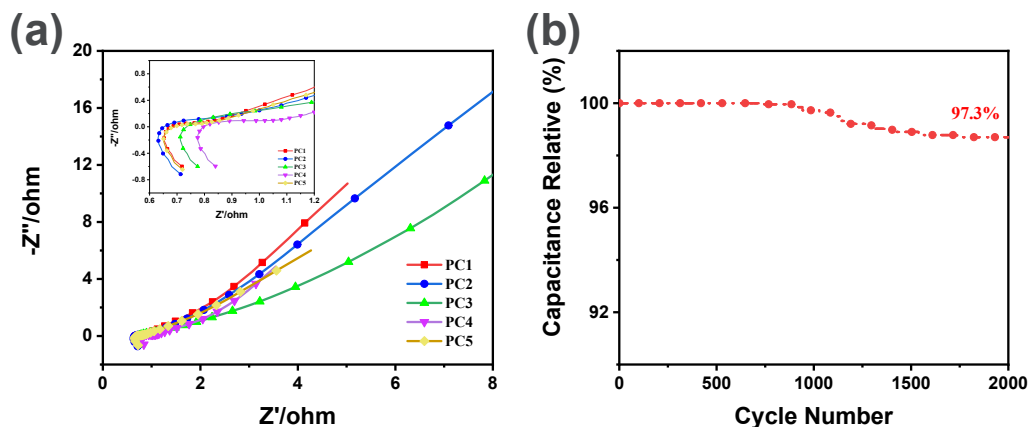

**Fig. S5** (a) Nyquist plots (the inset: the enlarged part) and (b) GCD cyclic measurement for PC4 at  $10 \text{ A g}^{-1}$ .

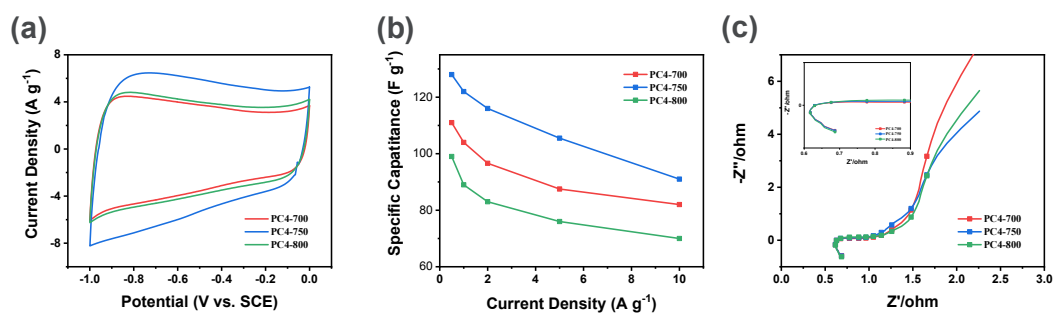

**Fig. S6** Samples at different temperatures (a) CV curves at  $50 \text{ mV s}^{-1}$ ; (b) specific capacitance at different current densities; (c) Nyquist plots (d) the enlarged part.

**Table S1.** Compare with other literature materials.

| <b>Materials</b> | <b>BET surface area (m<sup>2</sup>/g)</b> | <b>Half-wave potential V (vs. RHE)</b> | <b>Capacitance F g<sup>-1</sup></b> | <b>Reference</b> |
|------------------|-------------------------------------------|----------------------------------------|-------------------------------------|------------------|
| PC4              | 2092.2                                    | 0.78                                   | 128                                 | This work        |
| NPC-1000         | 140                                       | 0.82                                   | 140                                 | 1                |
| NPC-800          | 1109.2                                    | 0.79                                   |                                     | 2                |
| LEJC-600         | 1268                                      |                                        | 212                                 | 3                |
| S-800            | 2105.9                                    | 0.80                                   | 208                                 | 4                |
| THPC             | 2870                                      |                                        | 224                                 | 5                |
| NCA <sub>s</sub> | 1626                                      | 0.79                                   | 354                                 | 6                |

1. B. Guo, R. Ma, Z. Li, S. Guo, J. Luo, M. Yang, Q. Liu, T. Thomas and J. Wang, *Nano-Micro Lett*, 2020, **12**.
2. W. He, R. Ma, Y. Zhu, M. Yang and J. Wang, *J Inorg Mater*, 2019, **34**, 1115-1122.
3. L. Zhu, Q. Gao, Y. Tan, W. Tian, J. Xu, K. Yang and C. Yang, *Micropor and Mesopor Mat*, 2015, **210**, 1-9.
4. S. Gao, Y. Chen, H. Fan, X. Wei, C. Hu, H. Luo and L. Qu, *J Mater Chem A*, 2014, **2**, 3317.
5. L. Qie, W. Chen, H. Xu, X. Xiong, Y. Jiang, F. Zou, X. Hu, Y. Xin, Z. Zhang and Y. Huang, *Energ Environ Sci*, 2013, **6**, 2497.
6. J. Zhang, G. Chen, Q. Zhang, F. Kang and B. You, *ACS Appl Mater Interfaces*, 2015, **7**, 12760-12766.
